# Supplementary material for: The nature of π-hole spodium bonds in the HgLCl2(L = pyrrole, pyrazole, imidazole, pyridine, pyridazine, and pyrimidine) complexes: from noncovalent to covalent interactions
Source: Royal Society of Chemistry journal article supplement (doi:10.1039/d4nj00338a), 2024-01-01
Supplement: d4nj00338a1.pdf [file d4nj00338a1.pdf]

## Electronic Supplementary Material (ESI)

### The Nature of $\pi$ -Hole Spodium Bonds in the $\text{HgLCI}_2$ (L = pyrrole, pyrazole, imidazole, pyridine, pyridazine, and pyrimidine) Complexes: from Noncovalent to Covalent

Rong Tian<sup>a</sup>, Yanli Zeng<sup>a,b</sup>, Xiaoyan Li<sup>a,b</sup>, Xueying Zhang<sup>\*a,b</sup>

<sup>a</sup>College of Chemistry and Materials Science, Hebei Normal University, Shijiazhuang, 050024,  
China

<sup>b</sup>Hebei Key Laboratory of Inorganic Nano-materials, Hebei Normal University, Shijiazhuang,  
050024, China

#### Table of contents:

|           | page |
|-----------|------|
| Figure S1 | 2    |
| Table S1  | 2    |
| Figure S2 | 3    |
| Figure S3 | 3    |
| Figure S4 | 4    |
| Table S2  | 5    |
| Table S3  | 6    |
| Table S4  | 7    |
| Table S5  | 8    |

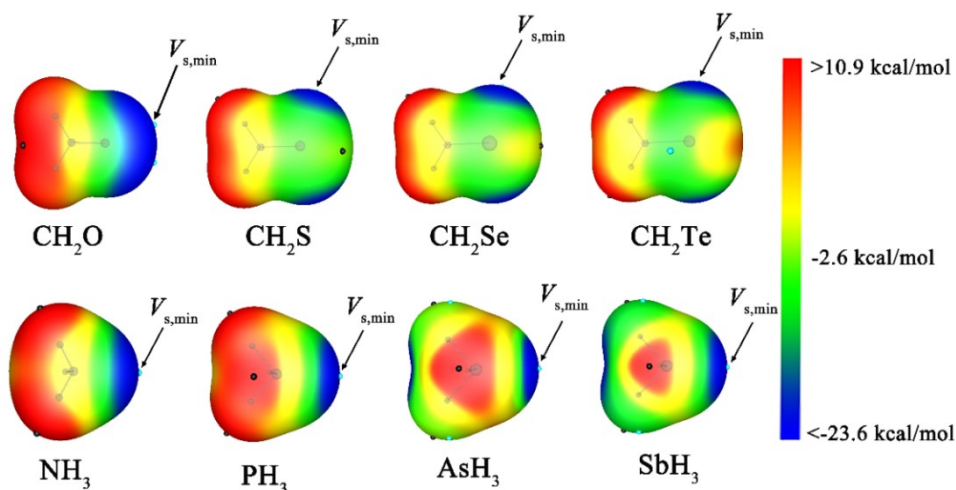

**Fig. S1** MEP graphs on the 0.001 a.u. molecular isosurfaces of  $ZH_3$  and  $CH_2Y$  ( $Z = N, P, As, \text{ and } Sb; Y = O, S, Se, \text{ and } Te$ ).

**Table S1** NOCV orbital energy ( $E_{\text{tot}}, E_{\text{orb}}$ , in kcal/mol) and charge transfer (CT, in e) in the complexes  $HgLCl_2 \cdots NH_3$ .

| complex         | $E_{\text{tot}}$  | NOCV pair     | $E_{\text{orb}}$ | $E_{\text{orb}}/E_{\text{tot}}$ | CT    |
|-----------------|-------------------|---------------|------------------|---------------------------------|-------|
| $1 \cdots NH_3$ | -6.56( $\alpha$ ) | 1( $\alpha$ ) | -5.27            | 0.80                            | 0.140 |
|                 |                   | 2( $\alpha$ ) | -0.43            | 0.07                            | 0.024 |
|                 | -6.55( $\beta$ )  | 1( $\beta$ )  | -5.27            | 0.80                            | 0.140 |
|                 |                   | 2( $\beta$ )  | -0.43            | 0.07                            | 0.024 |
| $2 \cdots NH_3$ | -14.24            | 1             | -11.41           | 0.80                            | 0.291 |
|                 |                   | 2             | -0.97            | 0.07                            | 0.050 |
| $3 \cdots NH_3$ | -13.07            | 1             | -10.49           | 0.80                            | 0.278 |
|                 |                   | 2             | -0.71            | 0.05                            | 0.049 |
| $4 \cdots NH_3$ | -12.93            | 1             | -10.41           | 0.81                            | 0.277 |
|                 |                   | 2             | -0.9             | 0.07                            | 0.047 |
| $5 \cdots NH_3$ | -18.12            | 1             | -13.08           | 0.72                            | 0.317 |
|                 |                   | 2             | -0.99            | 0.05                            | 0.051 |
|                 |                   | 3             | -2.08            | 0.11                            | 0.104 |
| $6 \cdots NH_3$ | -13.04            | 1             | -10.48           | 0.80                            | 0.280 |
|                 |                   | 2             | -0.55            | 0.04                            | 0.050 |

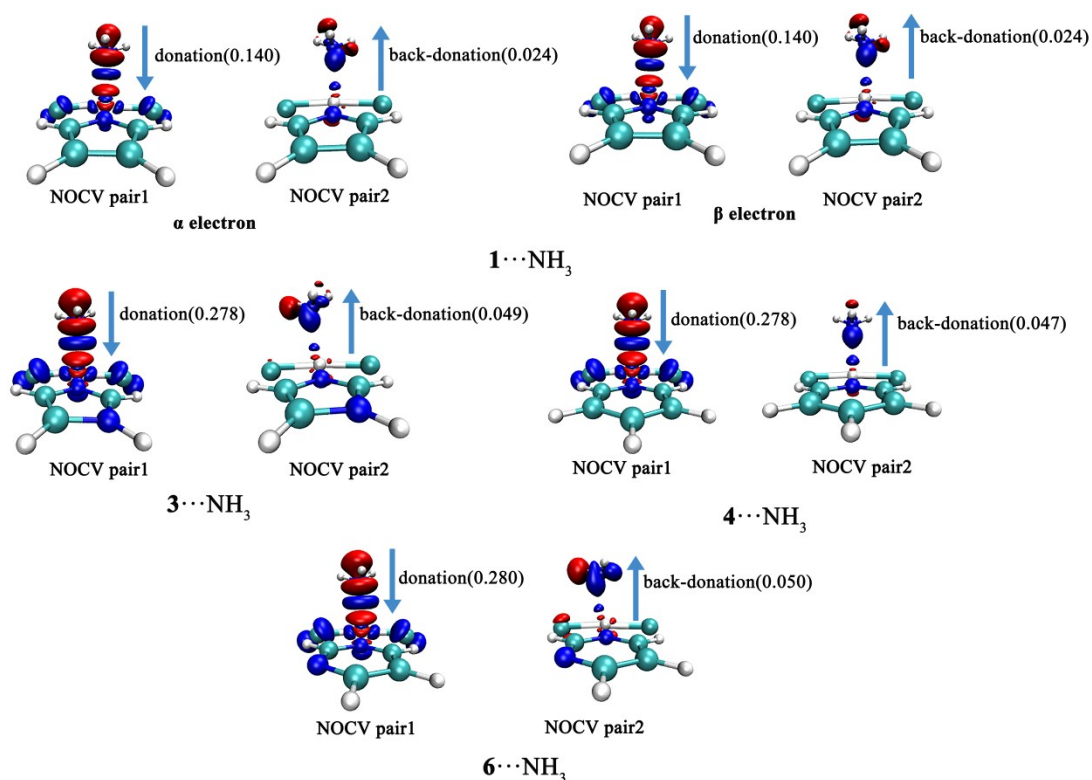

**Fig. S2** Isosurface of NOCV pair density map of the complexes  $\text{HgLCl}_2 \cdots \text{NH}_3$ . (L = pyrrole **1**, imidazole **3**, pyridine **4**, and pyrimidine **6**)

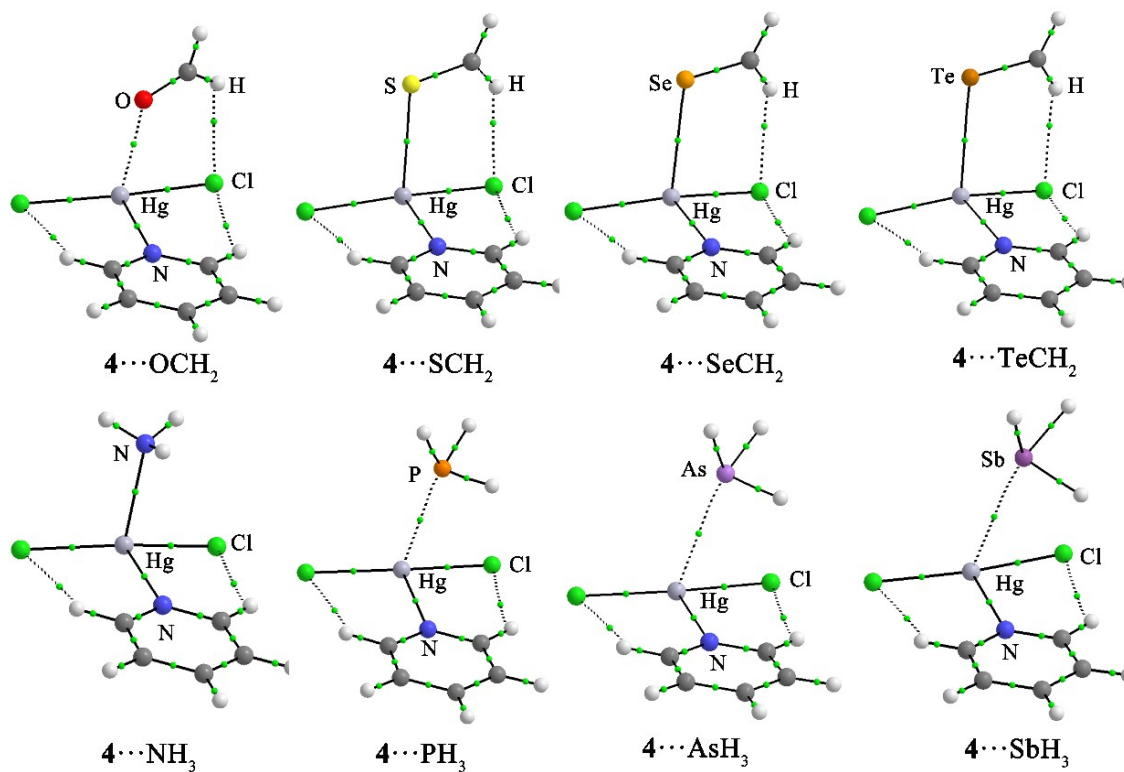

**Fig. S3** Molecular graphs of the complexes  $4 \cdots \text{YCH}_2$  and  $4 \cdots \text{ZH}_3$ .

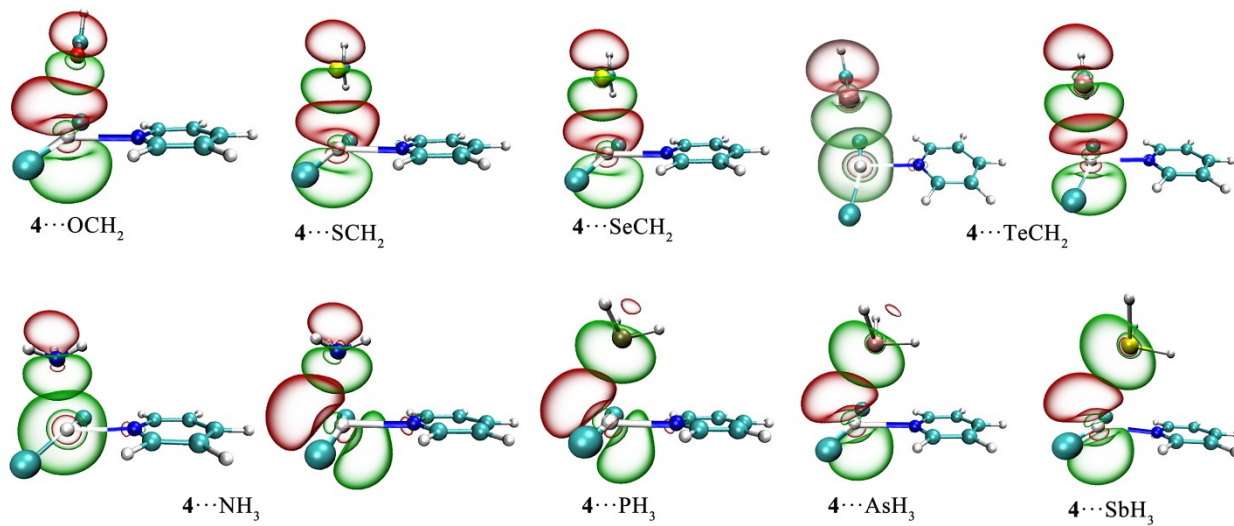

**Fig. S4** Schematic diagrams of main orbital interactions for the complexes.

**Table S2** Binding energies (in kcal/mol), binding distance (in Å), and topological parameters (in a.u.) at the bond critical points for HgLCl<sub>2</sub>···ZH<sub>3</sub> complexes (L= pyrrole **1**, pyrazole **2**, imidazole **3**, pyridazine **5**, and pyrimidine **6**; Z = N, P, As, and Sb)

| Complex                      | $\Delta E$ | $d$   | BCP     | $\rho_b$ | $\nabla^2\rho$ | $G_b$  | $V_b$   | $H_b$   | $-G_b/V_b$ |
|------------------------------|------------|-------|---------|----------|----------------|--------|---------|---------|------------|
| <b>1</b> ···NH <sub>3</sub>  | -8.30      | 2.563 | Hg···N  | 0.0420   | 0.1321         | 0.0361 | -0.0392 | -0.0031 | 0.9210     |
| <b>1</b> ···PH <sub>3</sub>  | -3.88      | 3.165 | Hg···P  | 0.0215   | 0.0472         | 0.0123 | -0.0128 | -0.0005 | 0.9604     |
| <b>1</b> ···AsH <sub>3</sub> | -3.81      | 3.448 | Hg···As | 0.0133   | 0.0307         | 0.0071 | -0.0066 | 0.0005  | 1.0812     |
| <b>1</b> ···SbH <sub>3</sub> | -3.90      | 3.758 | Hg···Sb | 0.0092   | 0.0198         | 0.0044 | -0.0039 | 0.0005  | 1.1396     |
| <b>2</b> ···NH <sub>3</sub>  | -9.23      | 2.543 | Hg···N  | 0.0437   | 0.1379         | 0.0380 | -0.0415 | -0.0035 | 0.9158     |
| <b>2</b> ···PH <sub>3</sub>  | -4.39      | 3.083 | Hg···P  | 0.0252   | 0.0543         | 0.0147 | -0.0158 | -0.0011 | 0.9291     |
| <b>2</b> ···AsH <sub>3</sub> | -4.24      | 3.391 | Hg···As | 0.0149   | 0.0340         | 0.0081 | -0.0077 | 0.0004  | 1.0514     |
| <b>2</b> ···SbH <sub>3</sub> | -4.23      | 3.641 | Hg···Sb | 0.0115   | 0.0240         | 0.0056 | -0.0052 | 0.0004  | 1.0768     |
| <b>3</b> ···NH <sub>3</sub>  | -8.14      | 2.561 | Hg···N  | 0.0421   | 0.1325         | 0.0362 | -0.0394 | -0.0031 | 0.9208     |
| <b>3</b> ···PH <sub>3</sub>  | -3.81      | 3.176 | Hg···P  | 0.0209   | 0.0461         | 0.0119 | -0.0124 | -0.0004 | 0.9657     |
| <b>3</b> ···AsH <sub>3</sub> | -3.78      | 3.445 | Hg···As | 0.0133   | 0.0308         | 0.0072 | -0.0066 | 0.0005  | 1.0814     |
| <b>3</b> ···SbH <sub>3</sub> | -4.05      | 3.708 | Hg···Sb | 0.0099   | 0.0214         | 0.0048 | -0.0043 | 0.0005  | 1.1201     |
| <b>5</b> ···NH <sub>3</sub>  | -9.76      | 2.518 | Hg···N  | 0.0461   | 0.1445         | 0.0402 | -0.0443 | -0.0041 | 0.9075     |
|                              |            | 2.238 | N···H   | 0.0151   | 0.0537         | 0.0111 | -0.0087 | 0.0024  | 1.2721     |
| <b>5</b> ···PH <sub>3</sub>  | -4.32      | 3.072 | Hg···P  | 0.0255   | 0.0540         | 0.0147 | -0.0160 | -0.0012 | 0.9228     |
|                              |            | 3.036 | N···H   | 0.0043   | 0.0151         | 0.0029 | -0.0020 | 0.0009  | 1.4672     |
| <b>5</b> ···AsH <sub>3</sub> | -4.14      | 3.369 | Hg···As | 0.0154   | 0.0348         | 0.0084 | -0.0080 | 0.0003  | 1.0427     |
|                              |            | 3.184 | N···H   | 0.0035   | 0.0119         | 0.0022 | -0.0014 | 0.0008  | 1.5365     |
| <b>5</b> ···SbH <sub>3</sub> | -4.15      | 3.675 | Hg···Sb | 0.0110   | 0.0228         | 0.0053 | -0.0048 | 0.0004  | 1.0909     |
| <b>6</b> ···NH <sub>3</sub>  | -8.77      | 2.571 | Hg···N  | 0.0413   | 0.1293         | 0.0353 | -0.0383 | -0.0030 | 0.9222     |
| <b>6</b> ···PH <sub>3</sub>  | -4.21      | 3.159 | Hg···P  | 0.0220   | 0.0481         | 0.0126 | -0.0132 | -0.0006 | 0.9566     |
| <b>6</b> ···AsH <sub>3</sub> | -4.15      | 3.401 | Hg···As | 0.0148   | 0.0337         | 0.0080 | -0.0076 | 0.0004  | 1.0547     |
| <b>6</b> ···SbH <sub>3</sub> | -3.99      | 3.680 | Hg···Sb | 0.0108   | 0.0226         | 0.0052 | -0.0048 | 0.0004  | 1.0934     |

**Table S3** Binding energies (in kcal/mol), binding distance (in Å), and topological parameters (in a.u.) at the bond critical points for HgLCl<sub>2</sub>···YCH<sub>2</sub> complexes (L= pyrrole **1**, pyrazole **2**, imidazole **3**, pyridazine **5**, and pyrimidine **6**; Y = O, S, Se, and Te)

| Complex                       | $\Delta E$ | $d$   | BCP     | $\rho_b$ | $\nabla^2\rho$ | $G_b$  | $V_b$   | $H_b$   | $-G_b/V_b$ |
|-------------------------------|------------|-------|---------|----------|----------------|--------|---------|---------|------------|
| <b>1</b> ···OCH <sub>2</sub>  | -5.06      | 2.846 | Hg···O  | 0.0194   | 0.0723         | 0.0168 | -0.0156 | 0.0013  | 1.0809     |
|                               |            | 2.760 | Cl···H  | 0.0094   | 0.0302         | 0.0062 | -0.0048 | 0.0014  | 1.2802     |
| <b>1</b> ···SCH <sub>2</sub>  | -7.08      | 3.024 | Hg···S  | 0.0276   | 0.0653         | 0.0177 | -0.0190 | -0.0013 | 0.9293     |
|                               |            | 2.609 | Cl···H  | 0.0119   | 0.0379         | 0.0078 | -0.0060 | 0.0017  | 1.2840     |
| <b>1</b> ···SeCH <sub>2</sub> | -7.81      | 3.085 | Hg···Se | 0.0282   | 0.0585         | 0.0164 | -0.0182 | -0.0018 | 0.9017     |
|                               |            | 2.603 | Cl···H  | 0.0119   | 0.0380         | 0.0078 | -0.0060 | 0.0017  | 1.2908     |
| <b>1</b> ···TeCH <sub>2</sub> | -8.44      | 3.152 | Hg···Te | 0.0309   | 0.0527         | 0.0160 | -0.0189 | -0.0028 | 0.8494     |
|                               |            | 2.618 | Cl···H  | 0.0115   | 0.0367         | 0.0074 | -0.0057 | 0.0017  | 1.2999     |
| <b>2</b> ···OCH <sub>2</sub>  | -5.62      | 2.809 | Hg···O  | 0.0210   | 0.0785         | 0.0185 | -0.0173 | 0.0012  | 1.0666     |
|                               |            | 2.759 | Cl···H  | 0.0094   | 0.0299         | 0.0061 | -0.0048 | 0.0014  | 1.2840     |
| <b>2</b> ···SCH <sub>2</sub>  | -7.19      | 2.985 | Hg···S  | 0.0296   | 0.0699         | 0.0192 | -0.0210 | -0.0017 | 0.9170     |
|                               |            | 2.634 | Cl···H  | 0.0114   | 0.0364         | 0.0074 | -0.0058 | 0.0017  | 1.2880     |
| <b>2</b> ···SeCH <sub>2</sub> | -8.03      | 3.046 | Hg···Se | 0.0303   | 0.0626         | 0.0178 | -0.0200 | -0.0022 | 0.8910     |
|                               |            | 2.630 | Cl···H  | 0.0113   | 0.0363         | 0.0074 | -0.0057 | 0.0017  | 1.2952     |
| <b>2</b> ···TeCH <sub>2</sub> | -8.89      | 3.109 | Hg···Te | 0.0333   | 0.0560         | 0.0174 | -0.0209 | -0.0034 | 0.8360     |
|                               |            | 2.644 | Cl···H  | 0.0110   | 0.0351         | 0.0071 | -0.0055 | 0.0017  | 1.3038     |
| <b>3</b> ···OCH <sub>2</sub>  | -4.72      | 2.845 | Hg···O  | 0.0194   | 0.0724         | 0.0168 | -0.0156 | 0.0013  | 1.0812     |
|                               |            | 2.752 | Cl···H  | 0.0096   | 0.0306         | 0.0063 | -0.0049 | 0.0014  | 1.2770     |
| <b>3</b> ···SCH <sub>2</sub>  | -6.86      | 3.025 | Hg···S  | 0.0274   | 0.0652         | 0.0176 | -0.0189 | -0.0013 | 0.9310     |
|                               |            | 2.611 | Cl···H  | 0.0119   | 0.0378         | 0.0077 | -0.0060 | 0.0017  | 1.2833     |
| <b>3</b> ···SeCH <sub>2</sub> | -7.59      | 3.088 | Hg···Se | 0.0280   | 0.0583         | 0.0163 | -0.0180 | -0.0017 | 0.9040     |
|                               |            | 2.605 | Cl···H  | 0.0119   | 0.0379         | 0.0077 | -0.0060 | 0.0017  | 1.2901     |
| <b>3</b> ···TeCH <sub>2</sub> | -8.23      | 3.161 | Hg···Te | 0.0304   | 0.0523         | 0.0158 | -0.0185 | -0.0027 | 0.8542     |
|                               |            | 2.624 | Cl···H  | 0.0114   | 0.0362         | 0.0074 | -0.0057 | 0.0017  | 1.3004     |
| <b>5</b> ···OCH <sub>2</sub>  | -4.72      | 2.875 | Hg···O  | 0.0183   | 0.0679         | 0.0157 | -0.0144 | 0.0013  | 1.0910     |
|                               |            | 2.792 | Cl···H  | 0.0090   | 0.0292         | 0.0060 | -0.0047 | 0.0013  | 1.2830     |
| <b>5</b> ···SCH <sub>2</sub>  | -7.04      | 2.994 | Hg···S  | 0.0291   | 0.0687         | 0.0188 | -0.0204 | -0.0016 | 0.9203     |
|                               |            | 2.626 | Cl···H  | 0.0115   | 0.0366         | 0.0075 | -0.0058 | 0.0017  | 1.2882     |
| <b>5</b> ···SeCH <sub>2</sub> | -7.97      | 3.045 | Hg···Se | 0.0303   | 0.0624         | 0.0178 | -0.0200 | -0.0022 | 0.8911     |
|                               |            | 2.639 | Cl···H  | 0.0111   | 0.0354         | 0.0072 | -0.0055 | 0.0017  | 1.2997     |
| <b>5</b> ···TeCH <sub>2</sub> | -9.14      | 3.097 | Hg···Te | 0.0340   | 0.0565         | 0.0177 | -0.0214 | -0.0036 | 0.8304     |
|                               |            | 2.695 | Cl···H  | 0.0099   | 0.0316         | 0.0064 | -0.0049 | 0.0015  | 1.3148     |
|                               |            | 3.384 | N···Te  | 0.0096   | 0.0258         | 0.0055 | -0.0045 | 0.0010  | 1.2106     |
| <b>6</b> ···OCH <sub>2</sub>  | -5.28      | 2.833 | Hg···O  | 0.0199   | 0.0743         | 0.0174 | -0.0161 | 0.0012  | 1.0761     |

|                                     |       |       |                |        |        |        |         |         |        |
|-------------------------------------|-------|-------|----------------|--------|--------|--------|---------|---------|--------|
|                                     |       | 2.782 | Cl $\cdots$ H  | 0.0091 | 0.0292 | 0.0060 | -0.0047 | 0.0013  | 1.2847 |
| <b>6</b> $\cdots$ SCH <sub>2</sub>  | -7.32 | 3.025 | Hg $\cdots$ S  | 0.0276 | 0.0651 | 0.0176 | -0.0190 | -0.0014 | 0.9284 |
|                                     |       | 2.622 | Cl $\cdots$ H  | 0.0116 | 0.0371 | 0.0076 | -0.0059 | 0.0017  | 1.2876 |
| <b>6</b> $\cdots$ SeCH <sub>2</sub> | -8.09 | 3.087 | Hg $\cdots$ Se | 0.0282 | 0.0582 | 0.0164 | -0.0182 | -0.0018 | 0.9008 |
|                                     |       | 2.618 | Cl $\cdots$ H  | 0.0116 | 0.0370 | 0.0075 | -0.0058 | 0.0017  | 1.2948 |
| <b>6</b> $\cdots$ TeCH <sub>2</sub> | -8.76 | 3.163 | Hg $\cdots$ Te | 0.0305 | 0.0518 | 0.0157 | -0.0184 | -0.0027 | 0.8512 |
|                                     |       | 2.636 | Cl $\cdots$ H  | 0.0111 | 0.0355 | 0.0072 | -0.0055 | 0.0017  | 1.3046 |

**Table S4** Major NBO results for the complexes HgLC<sub>2</sub> $\cdots$ ZH<sub>3</sub>(L= pyrrole **1**, pyrazole **2**, imidazole **3**, pyridazine **5**, and pyrimidine **6**; Z = N, P, As, and Sb) (energy, in kcal/mol, charge, in e)

| Complex                            | Donor NBO | Acceptor NBO       | $E^{(2)}$ | $Q_{CT}$ | WBI(Hg $\cdots$ Z) |
|------------------------------------|-----------|--------------------|-----------|----------|--------------------|
| <b>1</b> $\cdots$ NH <sub>3</sub>  | LP(N)     | $p_Z^*(\text{Hg})$ | 8.9       | 0.1040   | 0.18               |
|                                    | LP(N)     | $p_Z^*(\text{Hg})$ | 10.9      |          |                    |
| <b>1</b> $\cdots$ PH <sub>3</sub>  | LP(P)     | $p_Z^*(\text{Hg})$ | 6.5       | 0.0778   | 0.16               |
|                                    | LP(P)     | $p_Z^*(\text{Hg})$ | 5.8       |          |                    |
| <b>1</b> $\cdots$ AsH <sub>3</sub> | LP(As)    | $p_Z^*(\text{Hg})$ | 4.7       | 0.0391   | 0.09               |
|                                    | LP(As)    | $p_Z^*(\text{Hg})$ | 4.7       |          |                    |
| <b>1</b> $\cdots$ SbH <sub>3</sub> | LP(Sb)    | $p_Z^*(\text{Hg})$ | 3.0       | 0.0113   | 0.07               |
|                                    | LP(Sb)    | $p_Z^*(\text{Hg})$ | 2.9       |          |                    |
| <b>2</b> $\cdots$ NH <sub>3</sub>  | LP(N)     | $p_Z^*(\text{Hg})$ | 25.0      | 0.1085   | 0.19               |
| <b>2</b> $\cdots$ PH <sub>3</sub>  | LP(P)     | $p_Z^*(\text{Hg})$ | 20.5      | 0.0981   | 0.19               |
| <b>2</b> $\cdots$ AsH <sub>3</sub> | LP(As)    | $p_Z^*(\text{Hg})$ | 8.0       | 0.0477   | 0.11               |
| <b>2</b> $\cdots$ SbH <sub>3</sub> | LP(Sb)    | $p_Z^*(\text{Hg})$ | 6.0       | 0.0387   | 0.09               |
| <b>3</b> $\cdots$ NH <sub>3</sub>  | LP(N)     | $p_Z^*(\text{Hg})$ | 19.6      | 0.1034   | 0.18               |
| <b>3</b> $\cdots$ PH <sub>3</sub>  | LP(P)     | $p_Z^*(\text{Hg})$ | 12.7      | 0.0723   | 0.15               |
| <b>3</b> $\cdots$ AsH <sub>3</sub> | LP(As)    | $p_Z^*(\text{Hg})$ | 9.3       | 0.0194   | 0.09               |
| <b>3</b> $\cdots$ SbH <sub>3</sub> | LP(Sb)    | $p_Z^*(\text{Hg})$ | 5.7       | 0.0287   | 0.07               |
| <b>5</b> $\cdots$ NH <sub>3</sub>  | LP(N)     | $p_Z^*(\text{Hg})$ | 36.5      | 0.1070   | 0.20               |
| <b>5</b> $\cdots$ PH <sub>3</sub>  | LP(P)     | $p_Z^*(\text{Hg})$ | 25.1      | 0.0918   | 0.19               |
| <b>5</b> $\cdots$ AsH <sub>3</sub> | LP(As)    | $p_Z^*(\text{Hg})$ | 7.8       | 0.0488   | 0.11               |
| <b>5</b> $\cdots$ SbH <sub>3</sub> | LP(Sb)    | $p_Z^*(\text{Hg})$ | 6.0       | 0.0367   | 0.09               |
| <b>6</b> $\cdots$ NH <sub>3</sub>  | LP(N)     | $p_Z^*(\text{Hg})$ | 28.3      | 0.1024   | 0.18               |
| <b>6</b> $\cdots$ PH <sub>3</sub>  | LP(P)     | $p_Z^*(\text{Hg})$ | 19.0      | 0.0828   | 0.16               |
| <b>6</b> $\cdots$ AsH <sub>3</sub> | LP(As)    | $p_Z^*(\text{Hg})$ | 7.2       | 0.0506   | 0.11               |
| <b>6</b> $\cdots$ SbH <sub>3</sub> | LP(Sb)    | $p_Z^*(\text{Hg})$ | 6.4       | 0.03682  | 0.09               |

**Table S5** Major NBO results for the complexes  $\text{HgLCl}_2 \cdots \text{YCH}_2$  (L= pyrrole **1**, pyrazole **2**, imidazole **3**, pyridazine **5**, and pyrimidine **6**; Y = O, S, Se, and Te) (energy, in kcal/mol, charge, in e)

| Complex                             | Donor NBO | Acceptor NBO | $E^{(2)}$ | $Q_{\text{CT}}$ | WBI(Hg $\cdots$ Y) |
|-------------------------------------|-----------|--------------|-----------|-----------------|--------------------|
| <b>1</b> $\cdots$ OCH <sub>2</sub>  | LP(O)     | $p_z^*$ (Hg) | 3.2       | 0.0331          | 0.06               |
|                                     | LP(O)     | $p_z^*$ (Hg) | 2.7       |                 |                    |
| <b>1</b> $\cdots$ SCH <sub>2</sub>  | LP(S)     | $p_z^*$ (Hg) | 15.5      | 0.1238          | 0.21               |
|                                     | LP(S)     | $p_z^*$ (Hg) | 15.7      |                 |                    |
| <b>1</b> $\cdots$ SeCH <sub>2</sub> | -         | -            | -         | -               | 0.26               |
| <b>1</b> $\cdots$ TeCH <sub>2</sub> | -         | -            | -         | -               | 0.35               |
| <b>2</b> $\cdots$ OCH <sub>2</sub>  | LP(O)     | $p_z^*$ (Hg) | 6.9       | 0.0365          | 0.07               |
|                                     | LP(S)     | $p_z^*$ (Hg) | 33.9      |                 |                    |
| <b>2</b> $\cdots$ SCH <sub>2</sub>  | LP(S)     | $p_z^*$ (Hg) | 33.9      | 0.1358          | 0.23               |
| <b>2</b> $\cdots$ SeCH <sub>2</sub> | LP(Se)    | $p_z^*$ (Hg) | 43.2      | 0.1677          | 0.28               |
| <b>2</b> $\cdots$ TeCH <sub>2</sub> | LP(Te)    | $p_z^*$ (Hg) | 59.1      | 0.2406          | 0.38               |
| <b>3</b> $\cdots$ OCH <sub>2</sub>  | LP(O)     | $p_z^*$ (Hg) | 6.6       | 0.0332          | 0.06               |
|                                     | LP(S)     | $p_z^*$ (Hg) | 30.2      |                 |                    |
| <b>3</b> $\cdots$ SCH <sub>2</sub>  | LP(S)     | $p_z^*$ (Hg) | 30.2      | 0.1219          | 0.21               |
| <b>3</b> $\cdots$ SeCH <sub>2</sub> | LP(Se)    | $p_z^*$ (Hg) | 38.8      | 0.1551          | 0.25               |
| <b>3</b> $\cdots$ TeCH <sub>2</sub> | -         | -            | -         | -               | 0.34               |
| <b>5</b> $\cdots$ OCH <sub>2</sub>  | LP(O)     | $p_z^*$ (Hg) | 5.3       | 0.0305          | 0.06               |
|                                     | LP(S)     | $p_z^*$ (Hg) | 29.4      |                 |                    |
| <b>5</b> $\cdots$ SCH <sub>2</sub>  | LP(S)     | $p_z^*$ (Hg) | 29.4      | 0.1290          | 0.22               |
| <b>5</b> $\cdots$ SeCH <sub>2</sub> | LP(Se)    | $p_z^*$ (Hg) | 34.9      | 0.1593          | 0.26               |
| <b>5</b> $\cdots$ TeCH <sub>2</sub> | LP(Te)    | $p_z^*$ (Hg) | 38.5      | 0.2244          | 0.36               |
| <b>6</b> $\cdots$ OCH <sub>2</sub>  | LP(O)     | $p_z^*$ (Hg) | 6.1       | 0.0346          | 0.07               |
|                                     | LP(S)     | $p_z^*$ (Hg) | 28.6      |                 |                    |
| <b>6</b> $\cdots$ SCH <sub>2</sub>  | LP(S)     | $p_z^*$ (Hg) | 28.6      | 0.1249          | 0.21               |
| <b>6</b> $\cdots$ SeCH <sub>2</sub> | LP(Se)    | $p_z^*$ (Hg) | 33.6      | 0.1540          | 0.25               |
| <b>6</b> $\cdots$ TeCH <sub>2</sub> | LP(Te)    | $p_z^*$ (Hg) | 37.6      | 0.2175          | 0.34               |

The symbol '-' indicates that the complex is regarded as a single fragment by NBO analysis.
